# Supplementary material
Source: publisher site journal article supplement (https://www.dovepress.com/article/464195)
Supplement: Supplementary file 1 [file get_supplementary_file.php]

*Strengths- participants’ comments*

Some of the comments of the PIA project partners are compelling:

• Association KBT: “There were shared stories and experiences related to the symptoms of dementia with a lot of enthusiasm”.

• ANS Italy: “The participants felt very comfortable during the training sessions”.

• Alzheimer Hellas: “It is very important that there were involved the caregivers as well as the authorities in this new potential role of PSW: it is so important to be a part of the PSW introduction in dementia services”.

• Asociatia Habilitas: “The participants were people with family members with dementia therefore the classes were very thought-provoking”.

• Asociatia AFECT: “They [the participants] felt like within a family during the training sessions and have expressed their desire to repeat such sessions and further deepen the knowledge in the field”.

*Weaknesses- partners’ comments*

• Association KBT considered as a weak point “the need of further communication on this subject as well as upon the grieving process”.

• ANS Italy stated: “there is no such a formal figure within our dementia care system with which one can share the same experiences”.

• Alzheimer Hellas: “There is a dementia care tradition in Greece but there are no classes taught at the university” and “The participants felt and expressed the fact that they were not ready to become PSW”.

• Asociatia Habilitas: “There is no policy approved in this matter in Romania”.

• Asociatia AFECT: “There is a lack of a real/tangible PSW to explain and clarify the real aspects in dementia care”.

*Opportunities- partners’ comments*

• Association KBT, our most experienced partner in the matter, highlighted several important opportunities: “the project role is to spread knowledge”. “The Training Session might represent the substance of a future officially recognized Training Course in Dementia”. “The courses represent a valuable input for the National Plan and for the healthcare workers: Dementia Care + Peer Support Workers”. “So far there is no connection between dementia and PSW and this is something we all should aim to”. “It is paramount to address the aspect of research in PSW and the implementation of this figure within the fight against dementia”. “It would be important to allocate 20% of the academic curricula to the insertion of the PSW in all fields”.

• ANS Italy specified: “it is vital to be involved in this system and to influence the decision makers as well as the important stakeholders in this subject”.

• Alzheimer Hellas saw a clear opportunity: “We had the chance to put into practice some techniques of the *Theatre of the Oppressed*, which is a role playing technique has been already implemented in caregivers’ support”.

• Asociatia Habilitas indicated: “the image of the PSW as a trained person to help people with dementia”.

• Asociatia AFECT stated that: “the participants have considered the sessions as prospects for a forthcoming career”.

*Threats*

• KBT Norway, the leading partner: “Without continuous improvement the interest of the participants’ interest might disappear”.

• ANS Italy: “We have trained people and for the moment there is a risk to not get them involved in such an activity”.

• Alzheimer Hellas: “The participants considered the training program to be quite tiresome”.

• Asociatia Habilitas: “We do not know when this will be used as we do not have yet a National Plan on Dementia in Romania”.

• Asociatia AFECT: “Although some of the participants saw this training course as an opportunity of a future job, this prospect is quite far”.
